# Supplementary material for: Phytate Hydrolysate Differently Modulates the Immune Response of Human Healthy and Cancer Colonocytes to Intestinal Bacteria
Source: MDPI journal article supplement (doi:10.3390/nu14204234), 2022-10-11
Supplement: s1 [file s1]

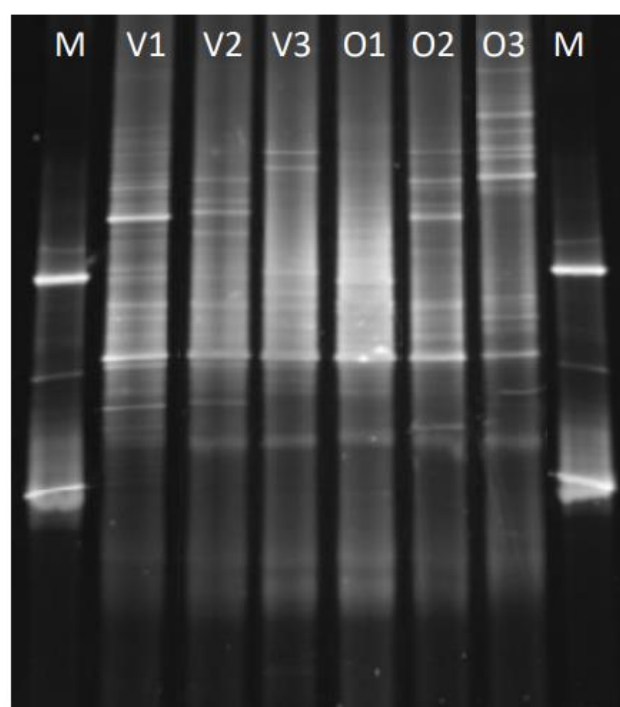

Figure S1. DGGE separation of 16S rRNA amplicons obtained from DNA isolated from bacterial cultures of fecal bacteria obtained from vegan (V1-V3) and omnivorous (O1-O3) volunteers. M – marker of separation distance.

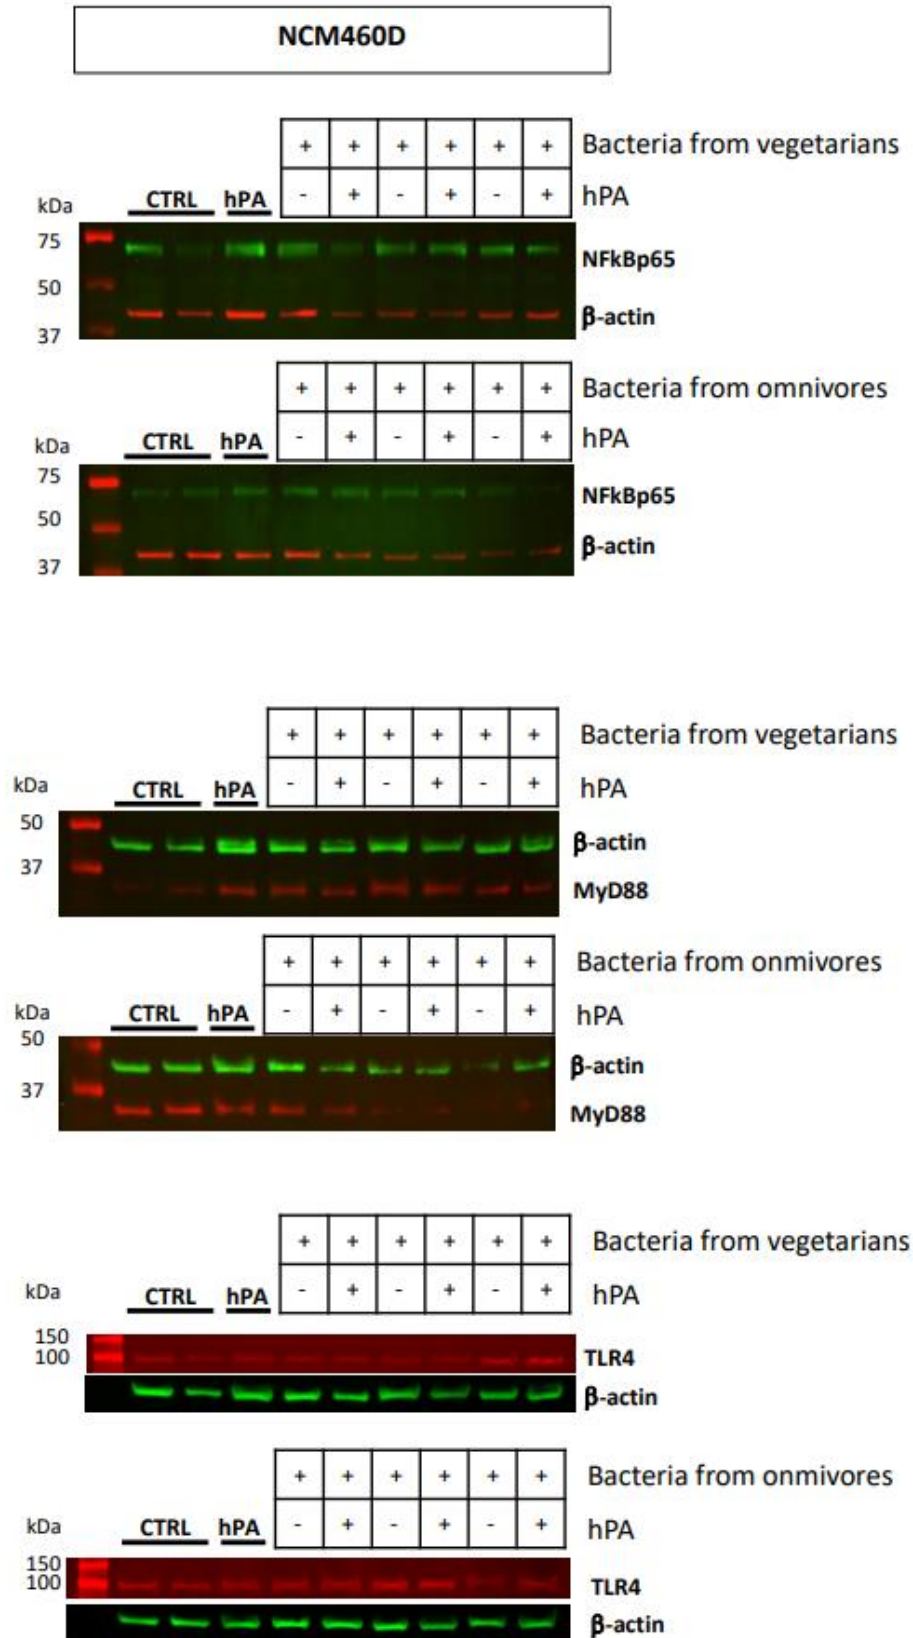

Figure S2. Exemplary immunoblots representing detection of indicated proteins in the whole cell extract from NCM460D cells.

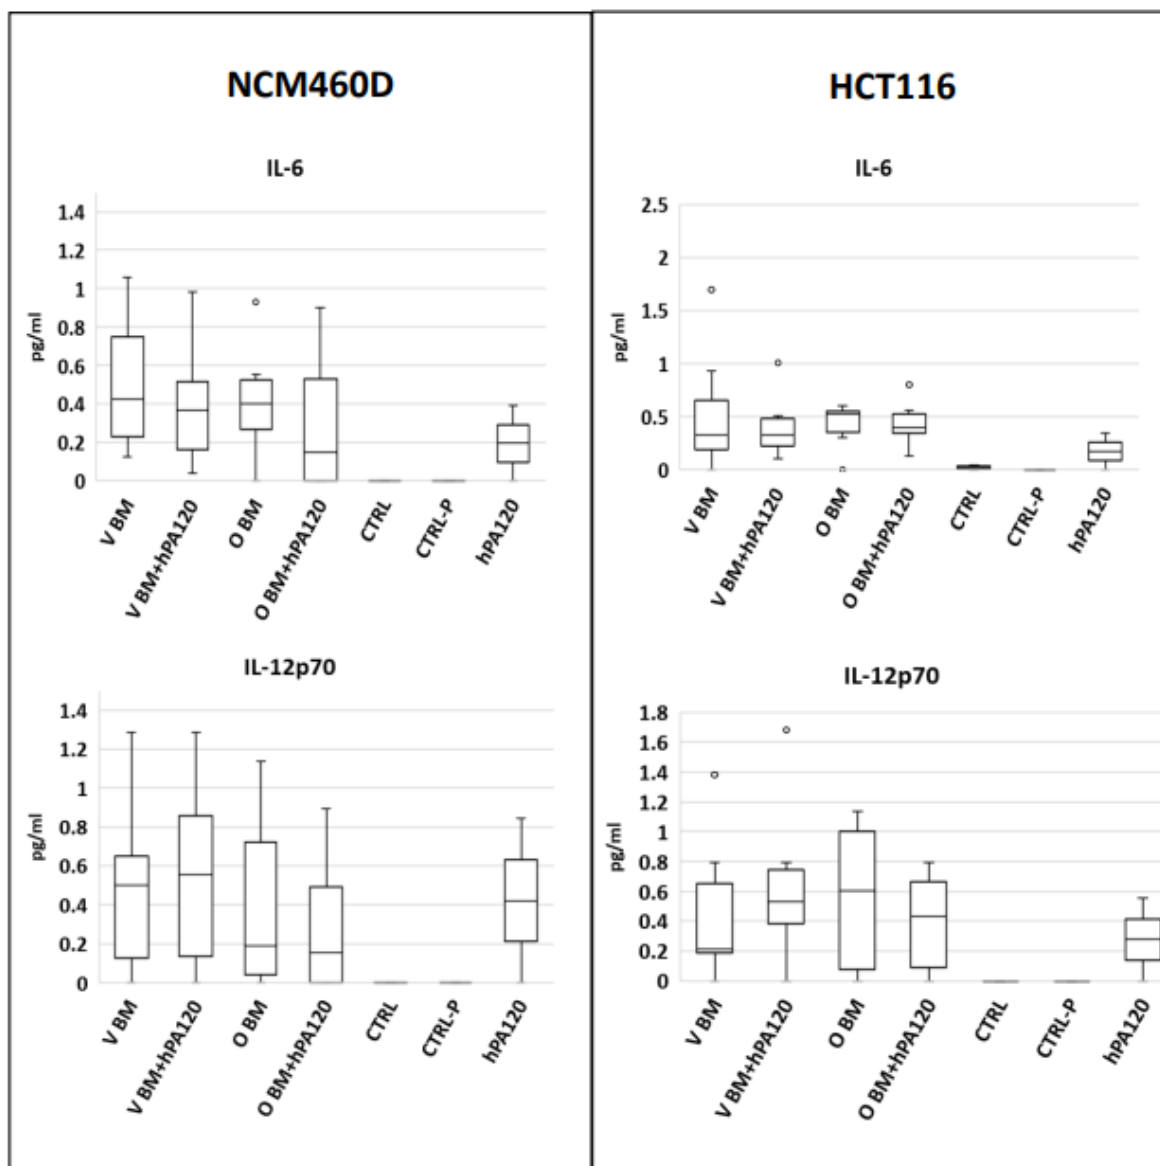

Figure S3. Secretion of IL-6 and IL-12p70 by healthy and cancer colonocytes (NCM460D and HCT116 cell lines, respectively) after 2 hour incubation with cultures of fecal bacteria alone (BM) or with bacterial cultures and phytate hydrolysate (BM+hPA120). V and O – fecal bacteria obtained from vegan and omnivorous volunteers, respectively. Cultures of fecal bacteria were carried out in modified Wilkins-Chalgren medium supplemented with 1 mM phytic acid and 0.5% mucin, incubated in anaerobic atmosphere, at 37°C for 40 h. Whiskers – non-outliers, box – 25%-75% non-outliers; horizontal line in the box – median; empty circles – outliers.

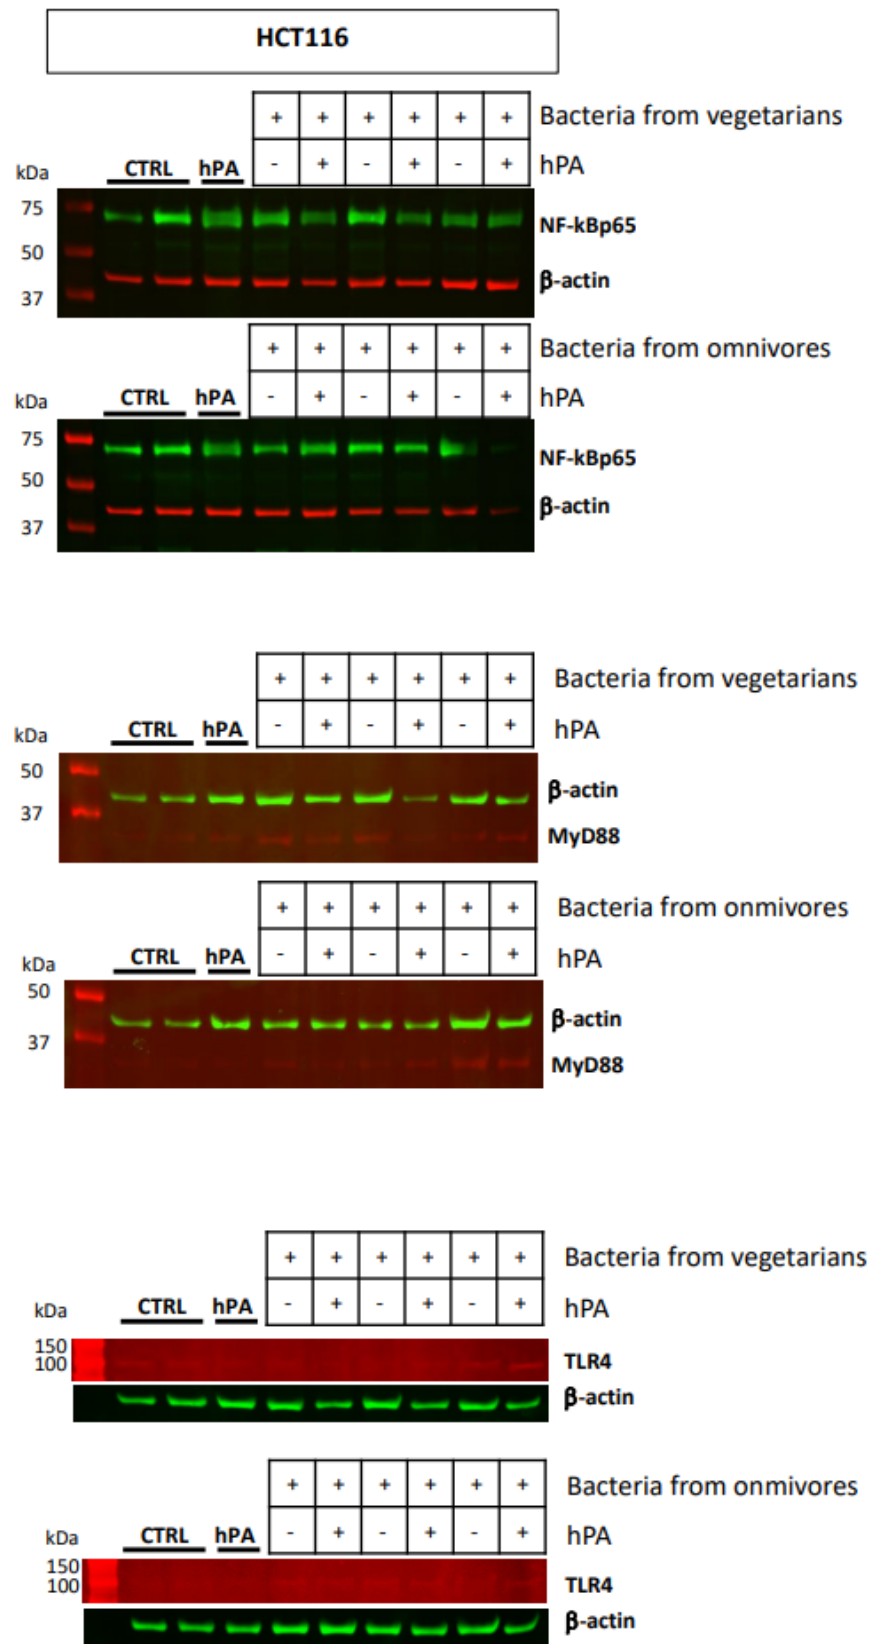

Figure S4. Exemplary immunoblots representing detection of indicated proteins in the whole cell extract from HCT116 cells.

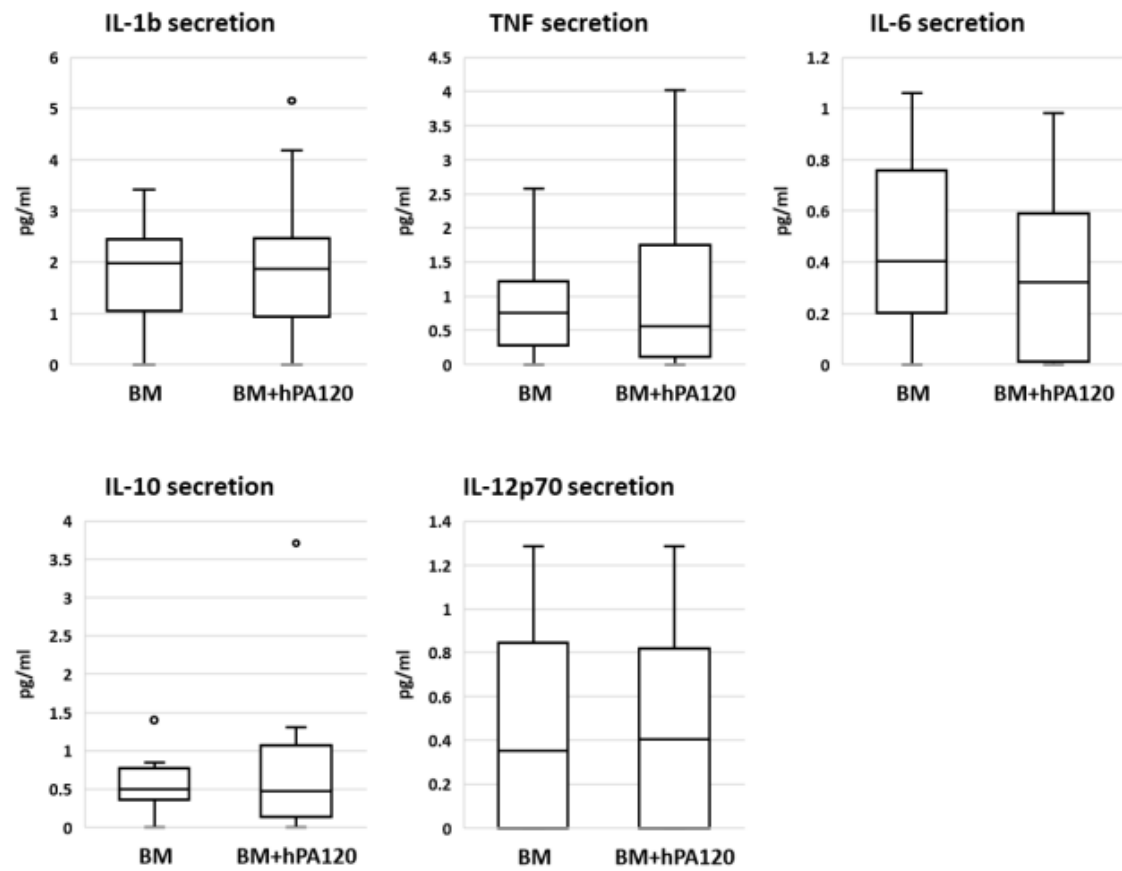

Figure S5. Concentrations of cytokines released to culture medium by NCM460D cells after 2 h incubation with BM (human gut bacteria grown in the presence of mucin and phytic acid) or BM and hydrolysate of phytic acid (BM+hPA120).

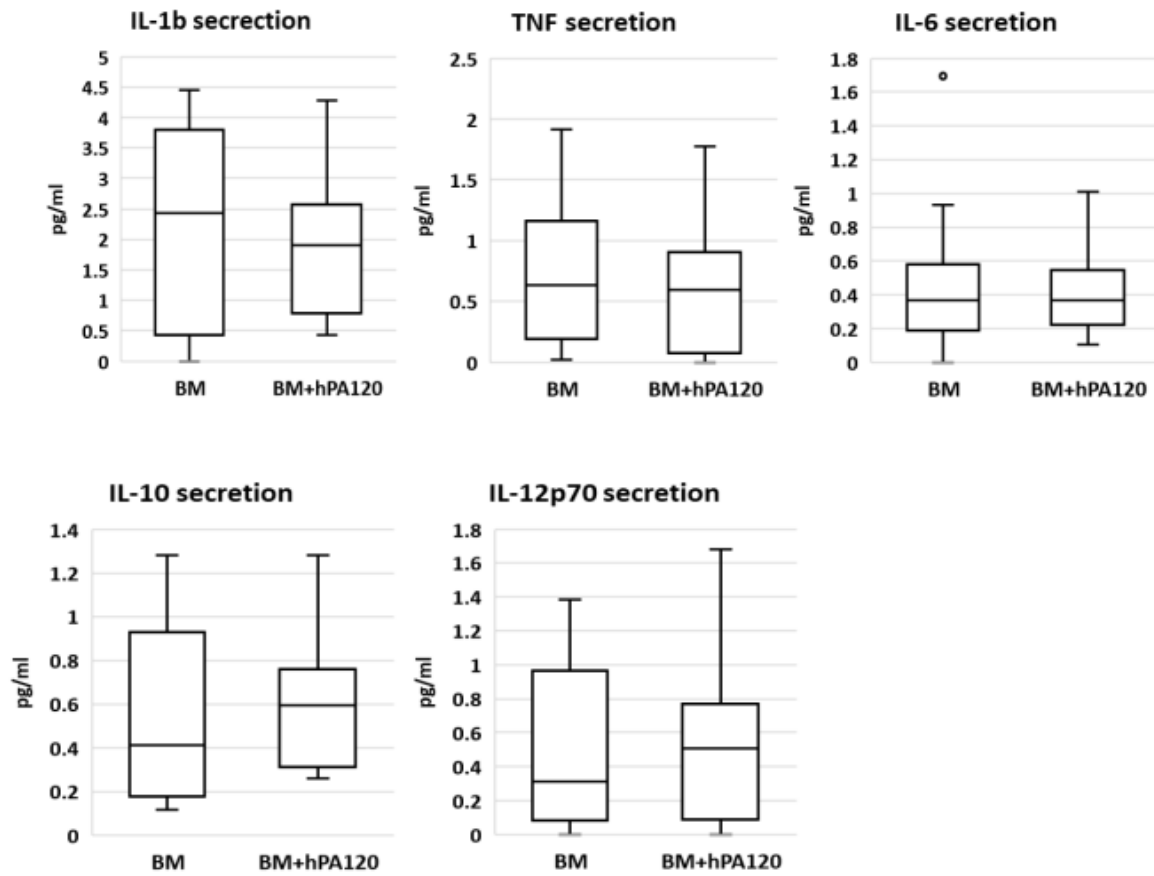

Figure S6. Concentrations of cytokines released to culture medium by HCT116 cells after 2 h incubation with BM (human gut bacteria grown in the presence of mucin and phytic acid) or BM and hydrolysate of phytic acid (BM+hPA120).

## Supplementary Information

Table S1. List of the authentic standards used for HPLC-MS analysis of the phytate preparation.

|     | Name of a standard                                                      | Producer, catalog number             | Inositol phosphate |
|-----|-------------------------------------------------------------------------|--------------------------------------|--------------------|
| 1.  | D- <i>myo</i> -Inositol 1,2,3,5,6-pentakisphosphate (decasodium salt)   | Sigma, 76667-1MG                     | 1,2,3,5,6-IP5      |
| 2.  | D- <i>myo</i> -Inositol-1,2,3,6-tetrakisphosphate (tetrapotassium salt) | Cayman Chemical, 10008450            | 1,2,3,6-IP4        |
| 3.  | D- <i>myo</i> -Inositol-1,2,5,6-tetrakisphosphate (ammonium salt)       | Santa Cruz Biotechnology, sc-214815  | 1,2,5,6-IP4        |
| 4.  | D- <i>myo</i> -Inositol-1,2,6-triphosphate (sodium salt)                | Santa Cruz Biotechnology, sc-223918  | 1,2,6-IP3          |
| 5.  | D- <i>myo</i> -Inositol 1,4,5-trisphosphate (hexapotassium salt)        | ENZO Life Sciences, ALX-307-009-M001 | 1,4,5-IP3          |
| 6.  | D- <i>myo</i> -Inositol-1,5,6-triphosphate (sodium salt)                | Santa Cruz Biotechnology, sc-205286  | 1,5,6-IP3          |
| 7.  | D- <i>myo</i> -Inositol-1,2-diphosphate (sodium salt)                   | Santa Cruz Biotechnology, sc-223910  | 1,2-IP2            |
| 8.  | D- <i>myo</i> -Inositol 1,4-bisphosphate (potassium salt)               | Santa Cruz Biotechnology, sc-214818  | 1,4-IP2            |
| 9.  | D- <i>myo</i> -Inositol-4,5-diphosphate (sodium salt)                   | Santa Cruz Biotechnology, sc-221514  | 4,5-IP2            |
| 10. | D- <i>myo</i> -Inositol-1-phosphate (sodium salt)                       | Santa Cruz Biotechnology, sc-223909  | 1-IP1              |
| 11. | <i>myo</i> -Inositol                                                    | Santa Cruz Biotechnology, 202714     | IP                 |

Table S2. Primers applied in the study.

| Name                 | Sequence<br>(5' → 3')                             | Target                                                            |
|----------------------|---------------------------------------------------|-------------------------------------------------------------------|
| ACTBf<br>ACTBr       | TGAAGTGTGACGTGGACATC<br>ACTCGTCATACTCCTGCTTG      | Beta-actin                                                        |
| MyD88-f<br>MyD88-r   | GCACATGGGCACATACAGAC<br>TAGCTGTTCTCTGGGAGCTGT     | Myeloid differentiation primary response 88                       |
| NFκB-f<br>NFκB-r     | ACAAATGGGCTACACCGAAG<br>TAGGGCTTTGGTTTACACGG      | Nuclear factor, light chain / polypeptide, p105                   |
| IL-8-f<br>IL-8-r     | ACATACTCCAAACCTTTCCACCC<br>CAACCCTCTGCACCCAGTTTTC | Interleukin 8                                                     |
| TNF-R-f<br>TNF-R-r   | CACCAGGTGTGATTTCAGGTG<br>CCCCACTGTGCTTTGTACCT     | Tumor necrosis factor receptor superfamily member 10b (TNFRSF10B) |
| TLR4-f<br>TLR4-r     | TGGACAGTTTCCACATTGA<br>TGCCATTGAAAGCAACTCTG       | Toll-like receptor 4                                              |
| IL-1βR-f<br>IL-1βR-r | CTG GCA CGT TTG TGA GAA GA<br>GTTCTTCAAGCAGGCAAAG | IL-1β receptor type I                                             |
